# Supplementary material
Source: PubMed Central journal article supplement (PMC11030868)

## Supplemental Material

### **Cluster Analysis**

#### Data Normalization

A  $z$ -score algorithm was applied to each analyte which returns the deviation of each data element from its mean, normalized by its standard deviation. Thus two vectors of analytes,  $r$  and  $s$ , can be plotted on the same scale and their values would correspond to each sample's deviation from the mean, zero.

The  $z$ -score transformation,  $z_i$ , of the  $i$ -th element of a vector of analytes,  $r$ , is:

$$z_i = \frac{r_i - \bar{r}}{\text{std}(r)}$$

$\bar{r}$  and  $\text{std}(r)$  are the arithmetic mean and sample standard deviation of the vector of analytes,  $r$ , respectively.

#### Distance Measure

The distance,  $d_{ij}$ , calculation for two vectors of analytes,  $i$  and  $j$ , is computed:

$$d_{ij} = 1 - \frac{(i - \bar{i}) \cdot (j - \bar{j})^T}{\left[ (i - \bar{i}) \cdot (i - \bar{i})^T \right]^{1/2} \left[ (j - \bar{j}) \cdot (j - \bar{j})^T \right]^{1/2}}$$

$^T$  is the matrix transposition operator, and  $\bar{i}$  and  $\bar{j}$  are the arithmetic mean of the vector of analytes  $i$  and  $j$ , respectively.

#### Cluster Linkage

Similar analytes were organized into a binary hierarchical cluster tree using an average linkage algorithm based on their distances,  $d_{ij}$ , calculated as above. At the first iteration, each cluster consisted of only one or two analytes. At the second and subsequent iterations of the algorithm two clusters,  $a$  and  $b$ , with the smallest average distance,  $l_{ab}$ , formed a cluster by comparing the unweighted average distance between all pairs of analytes in two clusters.

$$l_{ab} = \frac{1}{N \cdot M} \sum_{i=1}^N \sum_{j=1}^M d_{ij}$$

where  $N$  is the number of objects in cluster  $a$  and  $M$  is the number of objects in cluster  $b$ , and  $a_i$  is analyte  $i$  in cluster  $a$  and  $b_j$  is analyte  $j$  in cluster  $b$ , and the average linkage distance between  $a$  and  $b$  is  $l_{ab}$ .

### Cluster Visualization

The hierarchical, binary cluster tree defined by the distance measures were most easily understood when viewed graphically. At the first level of linkage, x-axis values between analytes were pairwise Pearson correlation coefficients. Comparisons between three or more analytes were more complex, as the linkage distances on the x-axis reflect the unweighted average Pearson correlation coefficient between all members.

Figure A1. Heat map (red: positive z-score; blue: negative z-score) of the 5+9 data set, displayed by distance (vertical axis: sampling day / subject identification; horizontal axis: endpoint).

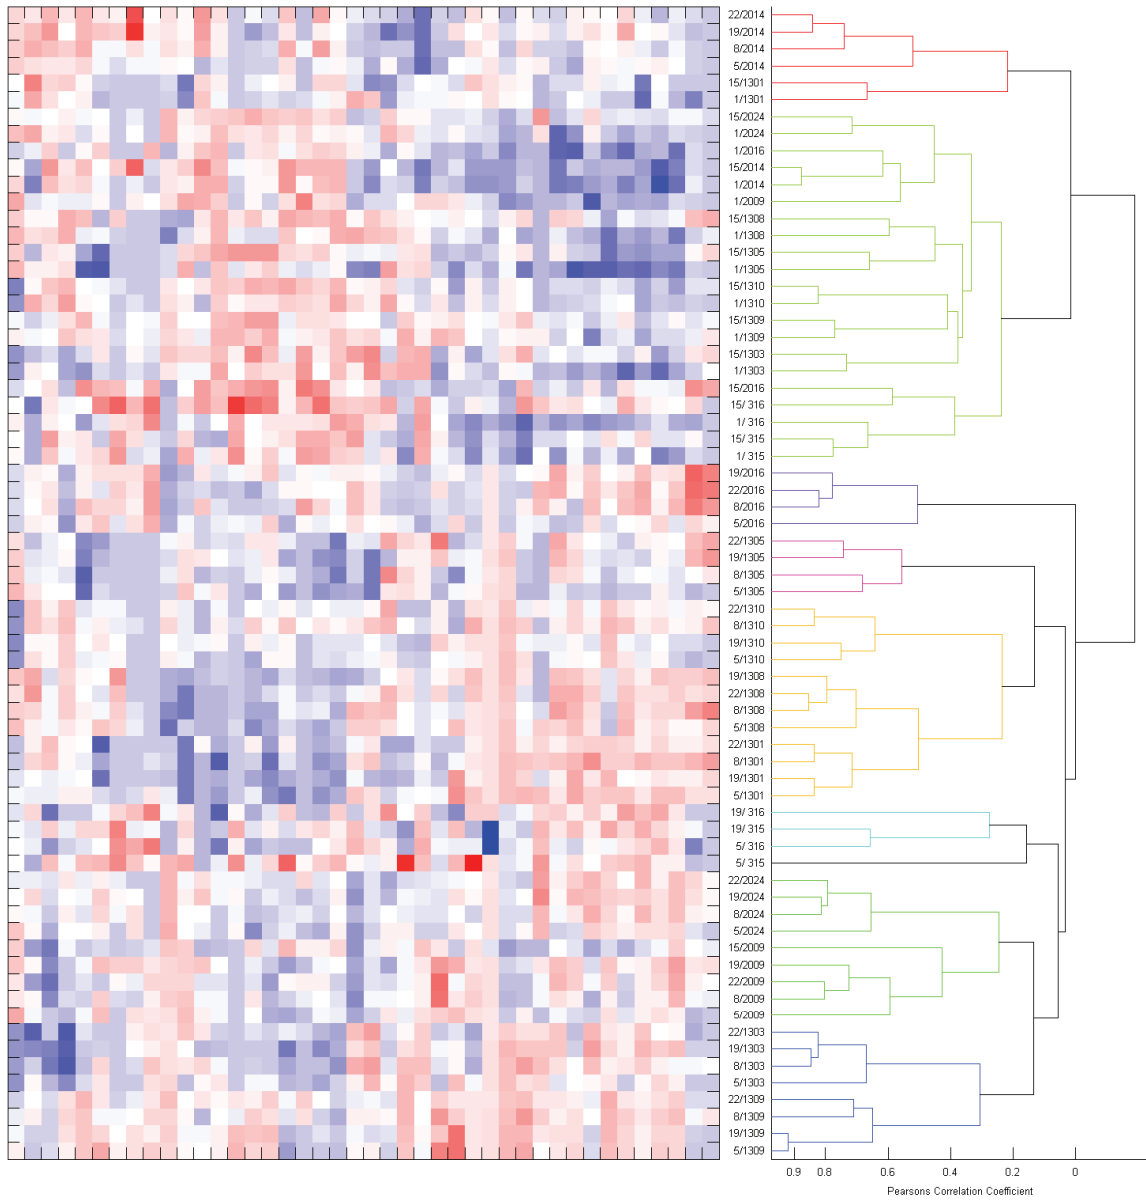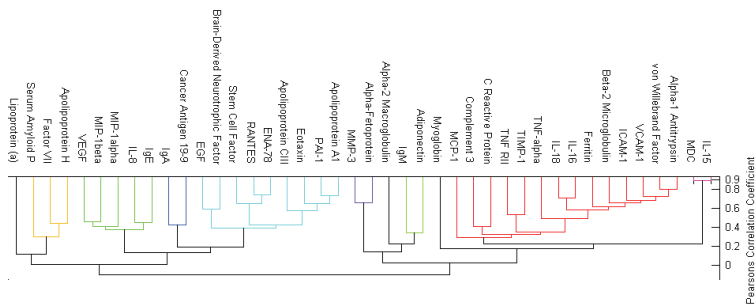

Supplement: 262_2008_600_MOESM1_ESM.pdf [file 262_2008_600_MOESM1_ESM.pdf]
